# Supplementary material for: The novel metalloligand [Fe(bppd)3] (bppd = 1,3-bis(4-pyridyl)-1,3-propanedionate) for the crystal engineering of heterometallic coordination networks with different silver salts. Anionic control of the structures
Source: Royal Society of Chemistry journal article supplement (doi:10.1039/c1ce05520h), 2011-01-01
Supplement: c1ce05520h.pdf [file c1ce05520h.pdf]

## The Novel Metalloligand [Fe(bppd)<sub>3</sub>] (bppd = 1,3-bis(4-pyridyl)-1,3-propanedionate) for the Crystal Engineering of Heterometallic Coordination Networks with different Silver Salts. Anionic Control of the Structures.

Lucia Carlucci,<sup>\*</sup> Gianfranco Ciani, Davide M. Proserpio and Marco Visconti

Università degli Studi di Milano, Dipartimento di Chimica Strutturale e Stereochimica Inorganica,  
Via G. Venezian 21, 20133 Milano, Italy.

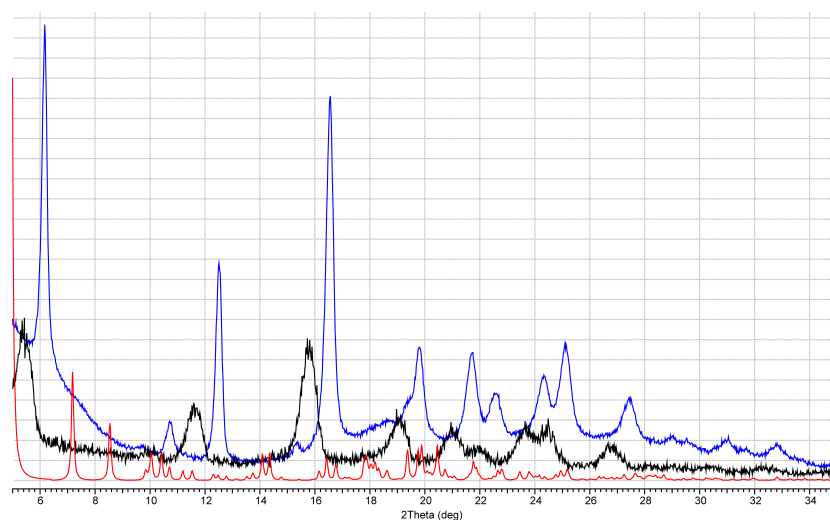

**Figure S1.** Red: calculated XRPD pattern from the crystal structure of **1a'**; blue: experimental XRPD pattern of **1a**; black: experimental XRPD pattern of **1b**.

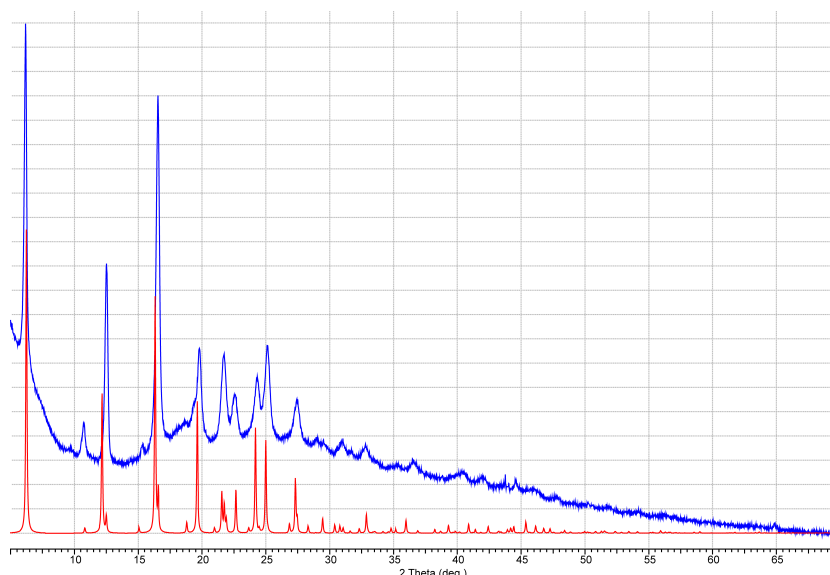

**Figure S2.** Blue: experimental XRPD pattern of **1a**; red: calculated XRPD pattern from the crystal structure of compound Al(DIPIRF)<sub>3</sub> (DIPIRF = 1-(4-pyridyl)-3-(phenyl)-1,3-propanedionate). Al(DIPIRF)<sub>3</sub> is under investigation in our laboratory and will be published elsewhere (Unit cell parameters:  $a = b = 16.333 \text{ \AA}$  ;  $c = 8.465 \text{ \AA}$  ;  $\alpha = \beta = 90^\circ$  ;  $\gamma = 120^\circ$  ;  $V = 1956 \text{ \AA}^3$  ; Space group P-3)

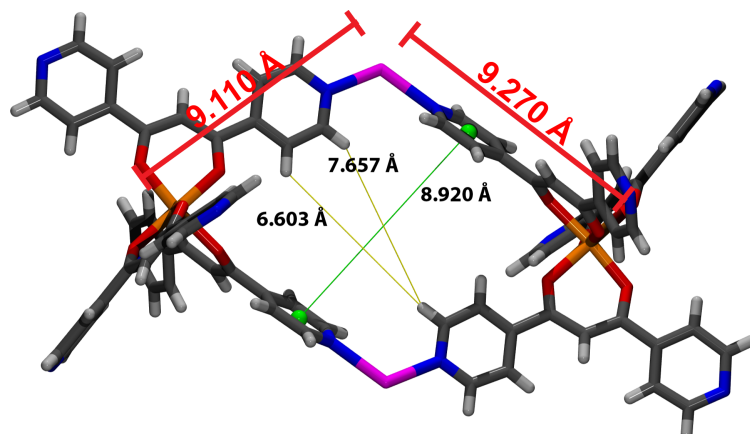

**Figure S3.** Dimensions of the rhombic cavity where the anions  $\text{ClO}_4^-$ ,  $\text{BF}_4^-$ ,  $\text{PF}_6^-$ ,  $\text{AsF}_6^-$  and  $\text{SbF}_6^-$  take place in compounds **2a-e**.

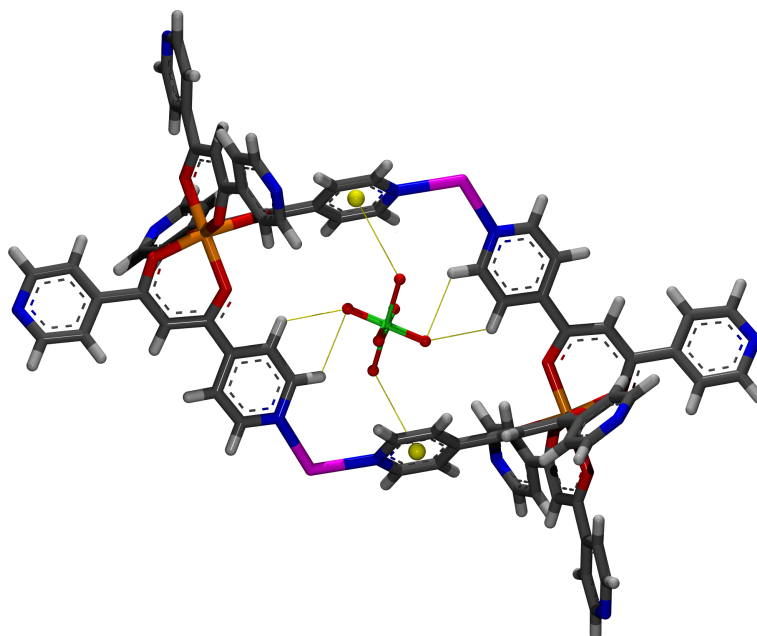

**Figure S4.** H-bonds and  $\pi$ -anion interactions in compounds **2c**.

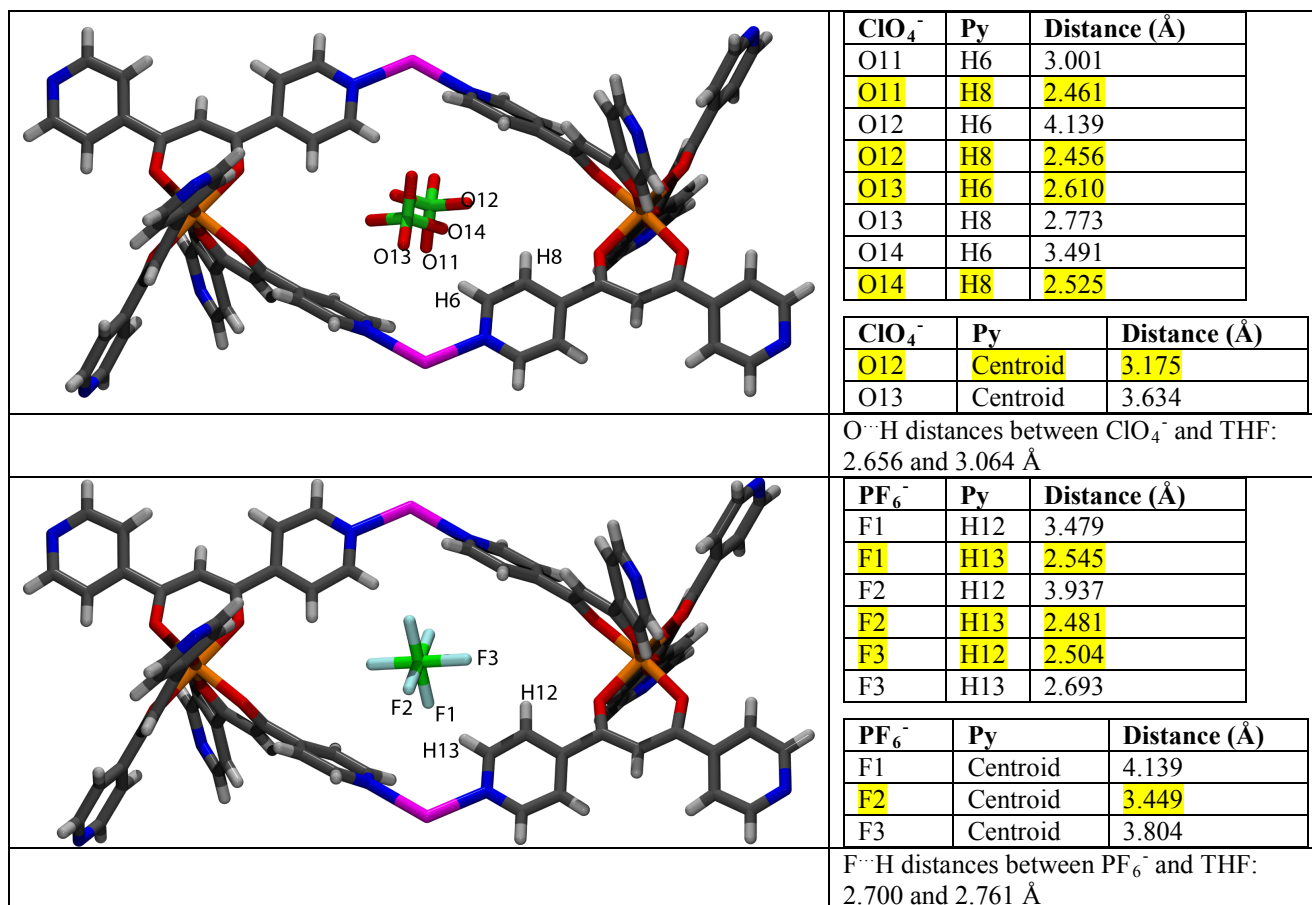

**Figure S5.** Selected weak interactions in compounds  $[\text{Fe}(\text{bppd})_3\text{Ag}]\text{ClO}_4$  (**2b**, top) and  $[\text{Fe}(\text{bppd})_3\text{Ag}]\text{PF}_6$  (**2c**, bottom).

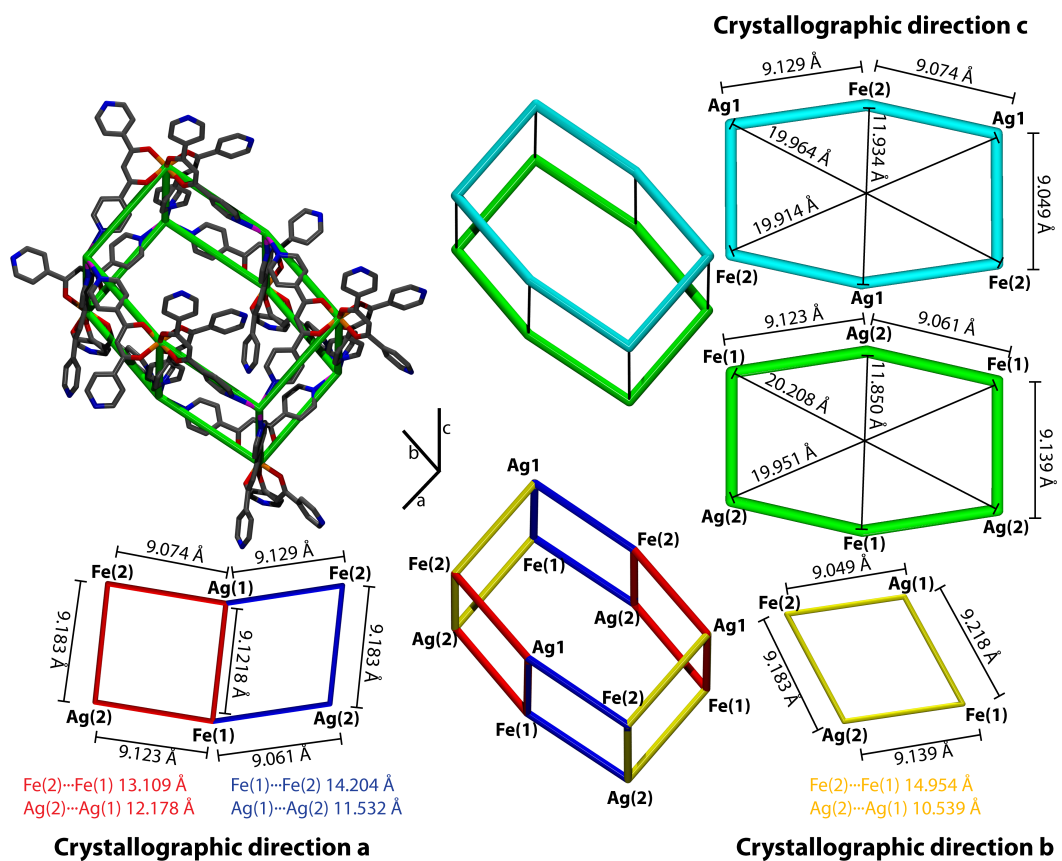

Figure S6. Geometrical details for compound 3a.



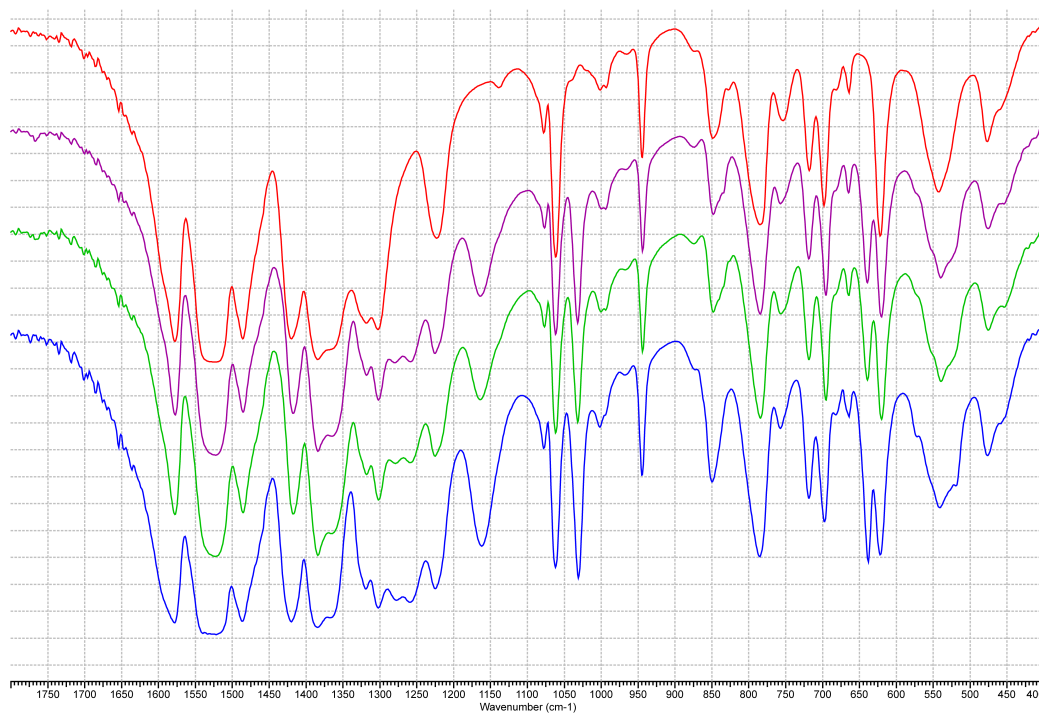

**Figure S7.** IR spectra of: blue = **3a**; Green = **4y**; Fuchsia = **4x**; Red = **4**.

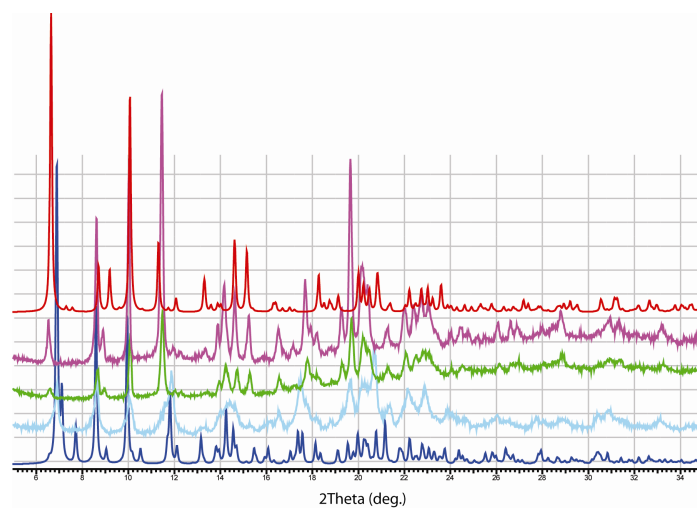

**Figure S8.** Blue: Calculated XRPD pattern of **3a**; Light blue: experimental XRPD pattern of **3a**; Green: experimental XRPD pattern of **4y**; Fuchsia: experimental XRPD pattern of **4x**; Red: calculated XRPD pattern of **4**.

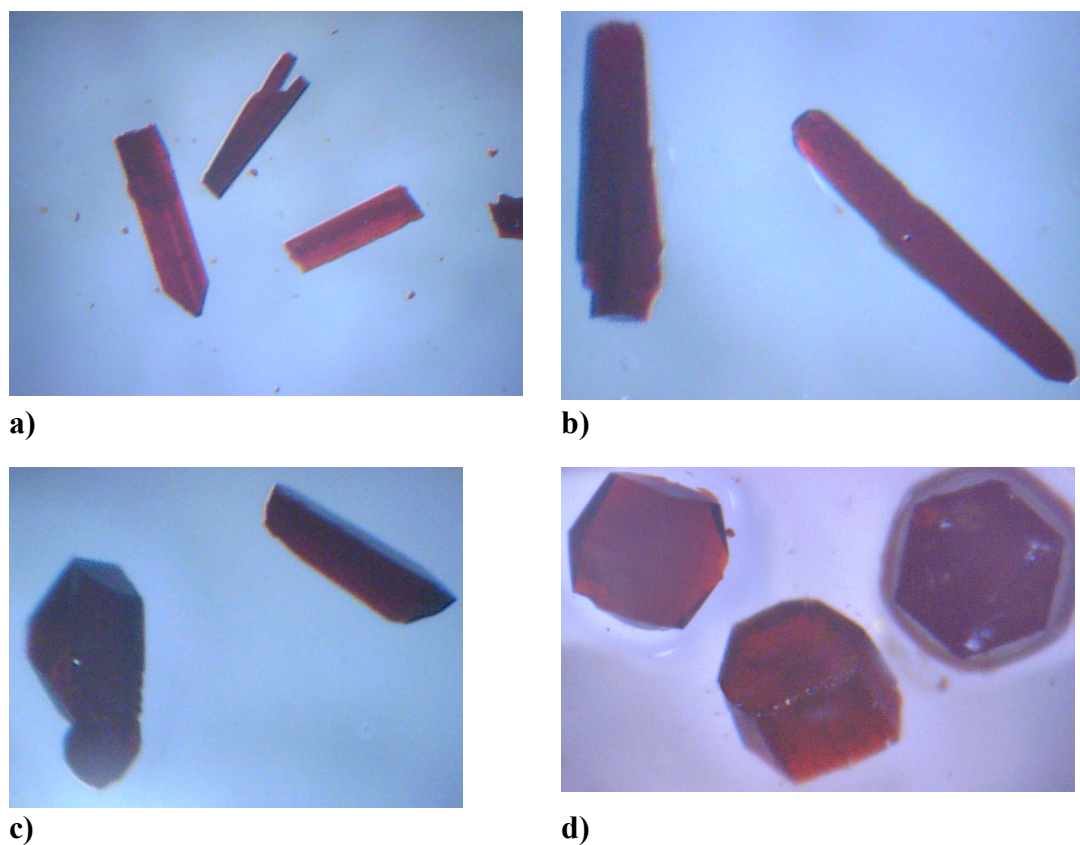

**Figure S9.** Crystals of: a)  $[\text{Fe}^{\text{III}}(\text{bppd})_3\text{Ag}]\text{SbF}_6 \cdot 4\text{THF}$  (**2e**); b)  $[\text{Fe}^{\text{III}}_2(\text{bppd})_6\text{Ag}_3](\text{NO}_3)_3$  (**4**); c)  $[\text{Fe}_2(\text{bppd})_6\text{Ag}_2](\text{CF}_3\text{SO}_3)_2$  (**3a**); d)  $[\text{M}_3(\text{bppd})_9\text{Ag}_5](\text{tosylate})_5$  (**5a**).

Table S1: Cell parameters (single crystals) for compounds **2d**, **2e**.

|           | System     | Space group  | a (Å)     | b (Å)    | c (Å)    | $\alpha$ (°) | $\beta$ (°) | $\gamma$ (°) | U(Å <sup>3</sup> ) | Temp. K |
|-----------|------------|--------------|-----------|----------|----------|--------------|-------------|--------------|--------------------|---------|
| <b>2d</b> | Monoclinic | C2/c (No.15) | 13.15(3)  | 23.51(5) | 17.53(3) | 90           | 98.52(4)    | 90           | 536(3)             | 150     |
| <b>2e</b> | Monoclinic | C2/c (No.15) | 13.305(8) | 23.98(2) | 17.83(1) | 90           | 99.82(1)    | 90           | 561(1)             | 100     |
